# Supplementary material for: Hydrogen peroxide as an oxidant in starch oxidation using molybdovanadophosphate for producing a high carboxylic content
Source: Royal Society of Chemistry journal article supplement (doi:10.1039/c5ra07747h), 2015-01-01
Supplement: c5ra07747h1.pdf [file c5ra07747h1.pdf]

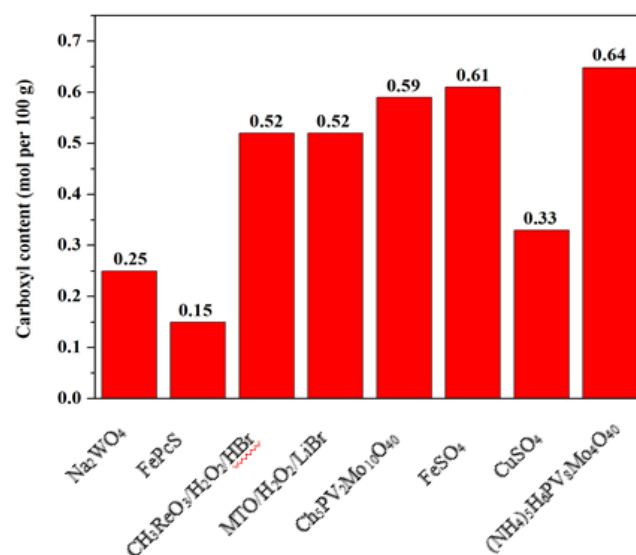

**Fig. S1** The comparison of different catalysts.

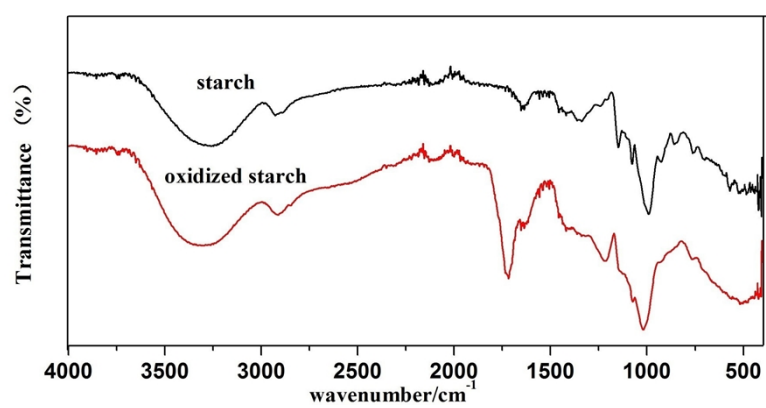

**Fig. S2** The IR spectra of oxidized starch and native starch
